# Supplementary material for: Uncoupling histone turnover from transcription-associated histone H3 modifications
Source: Oxford University Press journal article supplement (doi:10.1093/nar/gkv282), 2015-04-06
Supplement: gkv282_Supplementary_Data.zip [file gkv282_Supplementary_Data.zip]

Archive with 1 entries (1 files):
- NARgkv282_NAR-03564-X-2014_Suppl_Figures_CORRECTED_PROOFS.PDF
